# Supplementary material
Source: publisher figshare collection journal article supplement (https://acs.figshare.com/ndownloader/files/4550971)
Supplement: Supplementary file 1 [file 4550971]

 
#====================
data_global 
 
_publ_contact_author 
; 
   Prof. Vadim A. Soloshonok 
   Department of Chemistry and Biochemistry
   University of Oklahoma 
   620 Parrington Oval, Room 208
   Norman, OK  73019-3051  USA 
; 
_publ_contact_author_email      vadim@ou.edu 
_publ_contact_author_fax        1(405)3256111 
_publ_contact_author_phone      1(405)3258279 
 
_publ_requested_journal         'Journal name'  
 
loop_ 
    _publ_author_name 
    _publ_author_address 
  'Ueki, Hisanori' 
;  Department of Chemistry and Biochemistry
   University of Oklahoma 
   620 Parrington Oval, Room 208
   Norman, OK  73019-3051  USA 
; 
  'Soloshonok, Vadim A.' 
;  Department of Chemistry and Biochemistry
   University of Oklahoma 
   620 Parrington Oval, Room 208
   Norman, OK  73019-3051  USA 
; 
 
_publ_section_title 
; 
 article title here                            <-----
; 
_publ_section_references 
;
  Bruker (1998) SMART and SAINT, Bruker AXS, Inc., Madison, 
     Wisconsin, USA.
 
  Flack, H. D. (1983) Acta Cryst. A39, 876-881. 
 
  Sheldrick, G. M. (2002) SADABS.  Version 2.03.  University of 
     G\"ottingen, Germany
 
  Sheldrick, G. M. (2000) SHELXTL.  Version 6.10.  Bruker AXS, Inc., 
     Madison, Wisconsin, USA. 
;
_publ_section_acknowledgements 
; 
 The authors wish to thank the National Science Foundation 
 (CHE-0130835) and the University of Oklahoma for funds to 
 acquire the diffractometer and computers used in this work.  
; 
  
data_06014 
  
_audit_creation_method            SHELXL-97 
_chemical_name_systematic 
; 
 ? 
; 
_chemical_name_common             ? 
_chemical_melting_point           ? 
_chemical_formula_moiety 
 'C30 H33 N3 Ni O3, C H2 Cl2' 
_chemical_formula_sum 
 'C31 H35 Cl2 N3 Ni O3' 
_chemical_formula_weight          627.23 
  
loop_ 
 _atom_type_symbol 
 _atom_type_description 
 _atom_type_scat_dispersion_real 
 _atom_type_scat_dispersion_imag 
 _atom_type_scat_source 
 'C'  'C'   0.0033   0.0016 
 'International Tables Vol C Tables 4.2.6.8 and 6.1.1.4' 
 'H'  'H'   0.0000   0.0000 
 'International Tables Vol C Tables 4.2.6.8 and 6.1.1.4' 
 'N'  'N'   0.0061   0.0033 
 'International Tables Vol C Tables 4.2.6.8 and 6.1.1.4' 
 'O'  'O'   0.0106   0.0060 
 'International Tables Vol C Tables 4.2.6.8 and 6.1.1.4' 
 'Cl'  'Cl'   0.1484   0.1585 
 'International Tables Vol C Tables 4.2.6.8 and 6.1.1.4' 
 'Ni'  'Ni'   0.3393   1.1124 
 'International Tables Vol C Tables 4.2.6.8 and 6.1.1.4' 
  
_symmetry_cell_setting            Orthorhombic 
_symmetry_space_group_name_H-M    'P 21 21 21' 
  
loop_ 
 _symmetry_equiv_pos_as_xyz 
 'x, y, z' 
 '-x+1/2, -y, z+1/2' 
 '-x, y+1/2, -z+1/2' 
 'x+1/2, -y+1/2, -z' 
  
_cell_length_a                    10.0845(18) 
_cell_length_b                    10.515(2) 
_cell_length_c                    26.970(5) 
_cell_angle_alpha                 90.00 
_cell_angle_beta                  90.00 
_cell_angle_gamma                 90.00 
_cell_volume                      2859.9(9) 
_cell_formula_units_Z             4 
_cell_measurement_temperature     100(2) 
_cell_measurement_reflns_used     5201 
_cell_measurement_theta_min       2.46 
_cell_measurement_theta_max       28.25 
  
_exptl_crystal_description        needle 
_exptl_crystal_colour             red 
_exptl_crystal_size_max           0.30 
_exptl_crystal_size_mid           0.10 
_exptl_crystal_size_min           0.05 
_exptl_crystal_density_meas       ? 
_exptl_crystal_density_diffrn     1.457 
_exptl_crystal_density_method     'not measured' 
_exptl_crystal_F_000              1312 
_exptl_absorpt_coefficient_mu     0.904 
_exptl_absorpt_correction_type    multi-scan 
_exptl_absorpt_correction_T_min   0.7733 
_exptl_absorpt_correction_T_max   0.9562 
_exptl_absorpt_process_details    'SADABS (Sheldrick, 2002)' 
  
_exptl_special_details 
; 
 ? 
; 
  
_diffrn_ambient_temperature       100(2) 
_diffrn_radiation_wavelength      0.71073 
_diffrn_radiation_type            MoK\a 
_diffrn_radiation_source          'fine-focus sealed tube' 
_diffrn_radiation_monochromator   graphite 
_diffrn_measurement_device_type   'Bruker APEX' 
_diffrn_measurement_method        '\w scans' 
_diffrn_detector_area_resol_mean  ? 
_diffrn_standards_number          0 
_diffrn_standards_interval_count  ? 
_diffrn_standards_interval_time   ? 
_diffrn_standards_decay_%         ? 
_diffrn_reflns_number             15058 
_diffrn_reflns_av_R_equivalents   0.0278 
_diffrn_reflns_av_sigmaI/netI     0.0343 
_diffrn_reflns_limit_h_min        -12 
_diffrn_reflns_limit_h_max        12 
_diffrn_reflns_limit_k_min        -12 
_diffrn_reflns_limit_k_max        11 
_diffrn_reflns_limit_l_min        -29 
_diffrn_reflns_limit_l_max        33 
_diffrn_reflns_theta_min          2.08 
_diffrn_reflns_theta_max          25.99 
_reflns_number_total              5607 
_reflns_number_gt                 5282 
_reflns_threshold_expression      I>2\s(I) 
  
_computing_data_collection        'Bruker SMART' 
_computing_cell_refinement        'Bruker SMART' 
_computing_data_reduction         'Bruker SAINT' 
_computing_structure_solution     'SHELXS-97 (Sheldrick, 1990)' 
_computing_structure_refinement   'SHELXL-97 (Sheldrick, 1997)' 
_computing_molecular_graphics     'Bruker SHELXTL' 
_computing_publication_material   'Bruker SHELXTL' 
  
_refine_special_details 
; 
 Refinement of F^2^ against ALL reflections.  The weighted R-factor wR and 
 goodness of fit S are based on F^2^, conventional R-factors R are based 
 on F, with F set to zero for negative F^2^. The threshold expression of 
 F^2^ > 2sigma(F^2^) is used only for calculating R-factors(gt) etc. and is 
 not relevant to the choice of reflections for refinement.  R-factors based 
 on F^2^ are statistically about twice as large as those based on F, and R- 
 factors based on ALL data will be even larger. 
; 
  
_refine_ls_structure_factor_coef  Fsqd 
_refine_ls_matrix_type            full 
_refine_ls_weighting_scheme       calc 
_refine_ls_weighting_details 
 'calc w=1/[\s^2^(Fo^2^)+(0.0540P)^2^+0.8000P] where P=(Fo^2^+2Fc^2^)/3' 
_atom_sites_solution_primary      direct 
_atom_sites_solution_secondary    difmap 
_atom_sites_solution_hydrogens    geom 
_refine_ls_hydrogen_treatment     mixed 
_refine_ls_extinction_method      none 
_refine_ls_extinction_coef        ? 
_refine_ls_abs_structure_details 
 'Flack H D (1983), Acta Cryst. A39, 876-881' 
_refine_ls_abs_structure_Flack    0.011(11) 
_chemical_absolute_configuration  ad 
_refine_ls_number_reflns          5607 
_refine_ls_number_parameters      364 
_refine_ls_number_restraints      0 
_refine_ls_R_factor_all           0.0353 
_refine_ls_R_factor_gt            0.0325 
_refine_ls_wR_factor_ref          0.0840 
_refine_ls_wR_factor_gt           0.0824 
_refine_ls_goodness_of_fit_ref    1.010 
_refine_ls_restrained_S_all       1.010 
_refine_ls_shift/su_max           0.002 
_refine_ls_shift/su_mean          0.000 
  
loop_ 
 _atom_site_label 
 _atom_site_type_symbol 
 _atom_site_fract_x 
 _atom_site_fract_y 
 _atom_site_fract_z 
 _atom_site_U_iso_or_equiv 
 _atom_site_adp_type 
 _atom_site_occupancy 
 _atom_site_symmetry_multiplicity 
 _atom_site_calc_flag 
 _atom_site_refinement_flags 
 _atom_site_disorder_assembly 
 _atom_site_disorder_group 
Ni1 Ni 0.63836(3) 0.35409(3) 0.605871(11) 0.01145(9) Uani 1 1 d . . . 
O1 O 0.28015(17) 0.37723(18) 0.66160(7) 0.0178(4) Uani 1 1 d . . . 
O2 O 0.76012(17) 0.31041(18) 0.55681(7) 0.0161(4) Uani 1 1 d . . . 
O3 O 0.95924(17) 0.22536(18) 0.54507(7) 0.0168(4) Uani 1 1 d . . . 
N1 N 0.4991(2) 0.3798(2) 0.55814(8) 0.0136(5) Uani 1 1 d . . . 
H1N H 0.511(3) 0.334(3) 0.5344(12) 0.016 Uiso 1 1 d . . . 
N2 N 0.5095(2) 0.3859(2) 0.65362(8) 0.0120(5) Uani 1 1 d . . . 
N3 N 0.77489(19) 0.32739(19) 0.65086(8) 0.0109(4) Uani 1 1 d . . . 
C1 C 0.3564(3) 0.6901(3) 0.57590(11) 0.0231(6) Uani 1 1 d . . . 
H1 H 0.2868 0.6713 0.5533 0.028 Uiso 1 1 calc R . . 
C2 C 0.3419(3) 0.7910(3) 0.60903(13) 0.0300(7) Uani 1 1 d . . . 
H2 H 0.2634 0.8409 0.6087 0.036 Uiso 1 1 calc R . . 
C3 C 0.4420(3) 0.8184(3) 0.64239(12) 0.0295(7) Uani 1 1 d . . . 
H3 H 0.4316 0.8861 0.6654 0.035 Uiso 1 1 calc R . . 
C4 C 0.5571(3) 0.7471(3) 0.64225(11) 0.0249(6) Uani 1 1 d . . . 
H4 H 0.6261 0.7662 0.6650 0.030 Uiso 1 1 calc R . . 
C5 C 0.5720(3) 0.6481(3) 0.60897(10) 0.0187(5) Uani 1 1 d . . . 
H5 H 0.6521 0.6005 0.6089 0.022 Uiso 1 1 calc R . . 
C6 C 0.4711(3) 0.6167(2) 0.57541(10) 0.0159(6) Uani 1 1 d . . . 
C7 C 0.4879(2) 0.5126(3) 0.53690(10) 0.0146(5) Uani 1 1 d . . . 
H7 H 0.4084 0.5145 0.5147 0.018 Uiso 1 1 calc R . . 
C8 C 0.6102(2) 0.5363(3) 0.50479(10) 0.0183(6) Uani 1 1 d . . . 
H8A H 0.6891 0.5406 0.5259 0.027 Uiso 1 1 d R . . 
H8B H 0.5998 0.6169 0.4869 0.027 Uiso 1 1 d R . . 
H8C H 0.6202 0.4667 0.4809 0.027 Uiso 1 1 d R . . 
C9 C 0.3768(2) 0.3268(2) 0.58265(9) 0.0135(5) Uani 1 1 d . . . 
C10 C 0.2466(2) 0.3681(3) 0.55911(10) 0.0174(6) Uani 1 1 d . . . 
H10A H 0.2499 0.3525 0.5233 0.026 Uiso 1 1 d R . . 
H10B H 0.2324 0.4589 0.5652 0.026 Uiso 1 1 d R . . 
H10C H 0.1735 0.3193 0.5737 0.026 Uiso 1 1 d R . . 
C11 C 0.3870(3) 0.1820(3) 0.58033(10) 0.0190(6) Uani 1 1 d . . . 
H11A H 0.3780 0.1539 0.5458 0.028 Uiso 1 1 d R . . 
H11B H 0.3161 0.1442 0.6003 0.028 Uiso 1 1 d R . . 
H11C H 0.4733 0.1551 0.5933 0.028 Uiso 1 1 d R . . 
C12 C 0.3822(2) 0.3691(2) 0.63736(9) 0.0129(5) Uani 1 1 d . . . 
C13 C 0.5390(3) 0.4468(2) 0.69863(9) 0.0127(5) Uani 1 1 d . . . 
C14 C 0.4447(3) 0.5207(3) 0.72416(10) 0.0169(5) Uani 1 1 d . . . 
H14 H 0.3545 0.5184 0.7140 0.020 Uiso 1 1 calc R . . 
C15 C 0.4809(3) 0.5966(3) 0.76385(10) 0.0180(6) Uani 1 1 d . . . 
H15 H 0.4157 0.6467 0.7801 0.022 Uiso 1 1 calc R . . 
C16 C 0.6121(3) 0.6003(2) 0.78019(10) 0.0180(5) Uani 1 1 d . . . 
H16 H 0.6378 0.6559 0.8063 0.022 Uiso 1 1 calc R . . 
C17 C 0.7038(3) 0.5219(2) 0.75783(10) 0.0152(5) Uani 1 1 d . . . 
H17 H 0.7922 0.5205 0.7700 0.018 Uiso 1 1 calc R . . 
C18 C 0.6698(2) 0.4436(2) 0.71736(9) 0.0132(5) Uani 1 1 d . . . 
C19 C 0.7773(2) 0.3651(2) 0.69667(9) 0.0130(5) Uani 1 1 d . . . 
C20 C 0.8831(2) 0.3254(2) 0.73252(9) 0.0138(5) Uani 1 1 d . . . 
C21 C 0.8438(3) 0.2510(2) 0.77304(9) 0.0153(5) Uani 1 1 d . . . 
H21 H 0.7525 0.2327 0.7779 0.018 Uiso 1 1 calc R . . 
C22 C 0.9363(3) 0.2043(3) 0.80584(10) 0.0187(6) Uani 1 1 d . . . 
H22 H 0.9087 0.1526 0.8328 0.022 Uiso 1 1 calc R . . 
C23 C 1.0701(3) 0.2324(3) 0.79955(10) 0.0206(6) Uani 1 1 d . . . 
H23 H 1.1339 0.1990 0.8219 0.025 Uiso 1 1 calc R . . 
C24 C 1.1098(3) 0.3090(3) 0.76065(10) 0.0187(6) Uani 1 1 d . . . 
H24 H 1.2009 0.3300 0.7569 0.022 Uiso 1 1 calc R . . 
C25 C 1.0174(2) 0.3555(3) 0.72690(9) 0.0149(5) Uani 1 1 d . . . 
H25 H 1.0454 0.4076 0.7001 0.018 Uiso 1 1 calc R . . 
C26 C 0.8858(2) 0.2528(2) 0.62894(9) 0.0134(5) Uani 1 1 d . . . 
H26 H 0.9712 0.2946 0.6384 0.016 Uiso 1 1 calc R . . 
C27 C 0.8895(3) 0.1133(2) 0.64696(10) 0.0170(6) Uani 1 1 d . . . 
H27 H 0.8724 0.1138 0.6835 0.020 Uiso 1 1 calc R . . 
C28 C 0.7826(3) 0.0324(3) 0.62294(12) 0.0259(7) Uani 1 1 d . . . 
H28A H 0.6953 0.0691 0.6301 0.039 Uiso 1 1 d R . . 
H28B H 0.7868 -0.0542 0.6362 0.039 Uiso 1 1 d R . . 
H28C H 0.7965 0.0302 0.5870 0.039 Uiso 1 1 d R . . 
C29 C 1.0271(3) 0.0561(3) 0.63879(11) 0.0244(6) Uani 1 1 d . . . 
H29A H 1.0288 -0.0312 0.6515 0.037 Uiso 1 1 d R . . 
H29B H 1.0934 0.1073 0.6564 0.037 Uiso 1 1 d R . . 
H29C H 1.0475 0.0556 0.6033 0.037 Uiso 1 1 d R . . 
C30 C 0.8695(3) 0.2626(2) 0.57246(9) 0.0130(5) Uani 1 1 d . . . 
Cl1S Cl 0.45905(9) 0.85347(12) 0.43327(3) 0.0507(3) Uani 1 1 d . . . 
Cl2S Cl 0.60709(7) 0.90183(7) 0.52425(3) 0.02689(17) Uani 1 1 d . . . 
C1S C 0.4705(3) 0.9466(3) 0.48780(12) 0.0309(7) Uani 1 1 d . . . 
H1S1 H 0.4791 1.0374 0.4786 0.037 Uiso 1 1 calc R . . 
H1S2 H 0.3882 0.9367 0.5074 0.037 Uiso 1 1 calc R . . 
  
loop_ 
 _atom_site_aniso_label 
 _atom_site_aniso_U_11 
 _atom_site_aniso_U_22 
 _atom_site_aniso_U_33 
 _atom_site_aniso_U_23 
 _atom_site_aniso_U_13 
 _atom_site_aniso_U_12 
Ni1 0.01141(14) 0.01542(16) 0.00751(15) -0.00090(13) -0.00008(12) 0.00116(13) 
O1 0.0147(9) 0.0237(11) 0.0149(9) -0.0021(8) 0.0028(7) -0.0012(7) 
O2 0.0146(9) 0.0234(10) 0.0104(9) -0.0019(8) 0.0000(7) 0.0025(7) 
O3 0.0150(9) 0.0233(10) 0.0122(9) -0.0010(8) 0.0017(7) 0.0010(8) 
N1 0.0148(10) 0.0166(13) 0.0094(11) -0.0030(9) 0.0017(8) 0.0005(8) 
N2 0.0136(10) 0.0130(12) 0.0096(11) -0.0002(9) 0.0005(8) 0.0003(8) 
N3 0.0121(10) 0.0120(11) 0.0085(10) 0.0013(8) 0.0013(8) 0.0004(8) 
C1 0.0196(13) 0.0193(13) 0.0304(16) -0.0037(11) 0.0056(12) -0.0018(11) 
C2 0.0258(15) 0.0240(15) 0.0403(18) -0.0027(14) 0.0169(14) 0.0004(12) 
C3 0.0431(18) 0.0202(15) 0.0253(16) -0.0094(12) 0.0173(14) -0.0088(13) 
C4 0.0388(17) 0.0198(14) 0.0162(15) -0.0004(12) 0.0033(13) -0.0089(13) 
C5 0.0244(13) 0.0163(12) 0.0153(13) 0.0040(12) 0.0020(10) -0.0028(11) 
C6 0.0187(12) 0.0131(13) 0.0159(14) 0.0042(10) 0.0031(10) -0.0026(10) 
C7 0.0145(12) 0.0175(13) 0.0120(13) 0.0006(10) -0.0007(10) -0.0004(10) 
C8 0.0208(14) 0.0189(14) 0.0151(13) 0.0022(11) 0.0033(11) -0.0005(11) 
C9 0.0110(11) 0.0179(13) 0.0116(12) -0.0001(10) -0.0010(10) -0.0021(10) 
C10 0.0136(11) 0.0254(15) 0.0133(13) 0.0016(12) -0.0022(10) -0.0026(11) 
C11 0.0194(14) 0.0206(14) 0.0169(14) -0.0032(11) 0.0020(11) -0.0037(10) 
C12 0.0154(12) 0.0096(12) 0.0136(12) 0.0028(9) 0.0009(10) 0.0019(10) 
C13 0.0184(12) 0.0094(12) 0.0103(12) 0.0021(10) 0.0021(10) -0.0010(10) 
C14 0.0164(12) 0.0216(14) 0.0126(13) 0.0025(11) 0.0010(11) 0.0022(10) 
C15 0.0225(14) 0.0151(13) 0.0164(14) -0.0013(11) 0.0041(11) 0.0052(10) 
C16 0.0270(14) 0.0145(12) 0.0126(13) -0.0013(10) -0.0016(11) -0.0002(11) 
C17 0.0173(13) 0.0159(13) 0.0125(13) 0.0014(11) -0.0004(10) -0.0010(10) 
C18 0.0164(12) 0.0120(12) 0.0112(12) 0.0016(10) 0.0046(10) 0.0003(10) 
C19 0.0148(11) 0.0102(12) 0.0141(12) 0.0023(11) 0.0003(9) -0.0034(10) 
C20 0.0174(12) 0.0131(12) 0.0107(12) -0.0032(9) -0.0010(10) 0.0014(10) 
C21 0.0179(12) 0.0164(12) 0.0116(13) -0.0034(10) 0.0009(10) -0.0034(10) 
C22 0.0255(14) 0.0182(14) 0.0124(13) 0.0004(11) 0.0016(11) 0.0013(11) 
C23 0.0227(14) 0.0232(15) 0.0159(14) -0.0038(12) -0.0054(11) 0.0066(11) 
C24 0.0154(13) 0.0267(14) 0.0142(13) -0.0066(11) -0.0012(10) 0.0020(10) 
C25 0.0147(11) 0.0189(13) 0.0110(12) -0.0045(11) 0.0020(9) 0.0007(11) 
C26 0.0114(12) 0.0161(13) 0.0126(13) -0.0004(10) 0.0015(10) 0.0022(10) 
C27 0.0203(13) 0.0184(14) 0.0121(13) 0.0020(10) 0.0014(10) 0.0015(10) 
C28 0.0301(16) 0.0199(15) 0.0276(16) 0.0031(12) -0.0042(13) -0.0051(12) 
C29 0.0240(15) 0.0254(16) 0.0237(16) 0.0080(12) 0.0018(12) 0.0072(12) 
C30 0.0156(12) 0.0119(12) 0.0114(12) -0.0017(9) 0.0005(10) -0.0022(10) 
Cl1S 0.0356(4) 0.0871(7) 0.0293(5) -0.0252(5) -0.0084(3) 0.0133(5) 
Cl2S 0.0265(4) 0.0323(4) 0.0219(4) 0.0046(3) -0.0024(3) -0.0044(3) 
C1S 0.0281(15) 0.0374(18) 0.0271(17) -0.0039(15) -0.0022(13) 0.0064(14) 
  
_geom_special_details 
; 
 All esds (except the esd in the dihedral angle between two l.s. planes) 
 are estimated using the full covariance matrix.  The cell esds are taken 
 into account individually in the estimation of esds in distances, angles 
 and torsion angles; correlations between esds in cell parameters are only 
 used when they are defined by crystal symmetry.  An approximate (isotropic) 
 treatment of cell esds is used for estimating esds involving l.s. planes. 
; 
  
loop_ 
 _geom_bond_atom_site_label_1 
 _geom_bond_atom_site_label_2 
 _geom_bond_distance 
 _geom_bond_site_symmetry_2 
 _geom_bond_publ_flag 
Ni1 N3 1.856(2) . ? 
Ni1 N2 1.860(2) . ? 
Ni1 O2 1.8626(18) . ? 
Ni1 N1 1.924(2) . ? 
O1 C12 1.222(3) . ? 
O2 C30 1.283(3) . ? 
O3 C30 1.232(3) . ? 
N1 C9 1.506(3) . ? 
N1 C7 1.514(3) . ? 
N1 H1N 0.81(3) . ? 
N2 C12 1.368(3) . ? 
N2 C13 1.404(3) . ? 
N3 C19 1.298(3) . ? 
N3 C26 1.488(3) . ? 
C1 C6 1.391(4) . ? 
C1 C2 1.394(4) . ? 
C1 H1 0.9500 . ? 
C2 C3 1.382(5) . ? 
C2 H2 0.9500 . ? 
C3 C4 1.381(5) . ? 
C3 H3 0.9500 . ? 
C4 C5 1.383(4) . ? 
C4 H4 0.9500 . ? 
C5 C6 1.402(4) . ? 
C5 H5 0.9500 . ? 
C6 C7 1.518(4) . ? 
C7 C8 1.528(3) . ? 
C7 H7 1.0000 . ? 
C8 H8A 0.9800 . ? 
C8 H8B 0.9800 . ? 
C8 H8C 0.9800 . ? 
C9 C10 1.522(3) . ? 
C9 C11 1.527(4) . ? 
C9 C12 1.542(3) . ? 
C10 H10A 0.9800 . ? 
C10 H10B 0.9800 . ? 
C10 H10C 0.9800 . ? 
C11 H11A 0.9800 . ? 
C11 H11B 0.9800 . ? 
C11 H11C 0.9800 . ? 
C13 C14 1.408(4) . ? 
C13 C18 1.413(4) . ? 
C14 C15 1.384(4) . ? 
C14 H14 0.9500 . ? 
C15 C16 1.395(4) . ? 
C15 H15 0.9500 . ? 
C16 C17 1.378(4) . ? 
C16 H16 0.9500 . ? 
C17 C18 1.409(4) . ? 
C17 H17 0.9500 . ? 
C18 C19 1.473(3) . ? 
C19 C20 1.499(3) . ? 
C20 C25 1.399(3) . ? 
C20 C21 1.401(4) . ? 
C21 C22 1.376(4) . ? 
C21 H21 0.9500 . ? 
C22 C23 1.392(4) . ? 
C22 H22 0.9500 . ? 
C23 C24 1.382(4) . ? 
C23 H23 0.9500 . ? 
C24 C25 1.392(4) . ? 
C24 H24 0.9500 . ? 
C25 H25 0.9500 . ? 
C26 C30 1.536(3) . ? 
C26 C27 1.546(4) . ? 
C26 H26 1.0000 . ? 
C27 C28 1.519(4) . ? 
C27 C29 1.528(4) . ? 
C27 H27 1.0000 . ? 
C28 H28A 0.9800 . ? 
C28 H28B 0.9800 . ? 
C28 H28C 0.9800 . ? 
C29 H29A 0.9800 . ? 
C29 H29B 0.9800 . ? 
C29 H29C 0.9800 . ? 
Cl1S C1S 1.771(3) . ? 
Cl2S C1S 1.756(3) . ? 
C1S H1S1 0.9900 . ? 
C1S H1S2 0.9900 . ? 
  
loop_ 
 _geom_angle_atom_site_label_1 
 _geom_angle_atom_site_label_2 
 _geom_angle_atom_site_label_3 
 _geom_angle 
 _geom_angle_site_symmetry_1 
 _geom_angle_site_symmetry_3 
 _geom_angle_publ_flag 
N3 Ni1 N2 95.32(9) . . ? 
N3 Ni1 O2 86.45(8) . . ? 
N2 Ni1 O2 175.44(9) . . ? 
N3 Ni1 N1 178.72(10) . . ? 
N2 Ni1 N1 85.88(9) . . ? 
O2 Ni1 N1 92.32(9) . . ? 
C30 O2 Ni1 115.43(16) . . ? 
C9 N1 C7 116.5(2) . . ? 
C9 N1 Ni1 104.61(15) . . ? 
C7 N1 Ni1 115.93(16) . . ? 
C9 N1 H1N 105(2) . . ? 
C7 N1 H1N 105(2) . . ? 
Ni1 N1 H1N 110(2) . . ? 
C12 N2 C13 122.3(2) . . ? 
C12 N2 Ni1 114.23(17) . . ? 
C13 N2 Ni1 122.19(17) . . ? 
C19 N3 C26 121.7(2) . . ? 
C19 N3 Ni1 126.16(17) . . ? 
C26 N3 Ni1 112.17(15) . . ? 
C6 C1 C2 121.0(3) . . ? 
C6 C1 H1 119.5 . . ? 
C2 C1 H1 119.5 . . ? 
C3 C2 C1 120.0(3) . . ? 
C3 C2 H2 120.0 . . ? 
C1 C2 H2 120.0 . . ? 
C4 C3 C2 119.9(3) . . ? 
C4 C3 H3 120.1 . . ? 
C2 C3 H3 120.1 . . ? 
C3 C4 C5 120.1(3) . . ? 
C3 C4 H4 119.9 . . ? 
C5 C4 H4 119.9 . . ? 
C4 C5 C6 121.2(3) . . ? 
C4 C5 H5 119.4 . . ? 
C6 C5 H5 119.4 . . ? 
C1 C6 C5 117.8(3) . . ? 
C1 C6 C7 120.0(2) . . ? 
C5 C6 C7 122.1(2) . . ? 
N1 C7 C6 114.5(2) . . ? 
N1 C7 C8 107.7(2) . . ? 
C6 C7 C8 111.1(2) . . ? 
N1 C7 H7 107.8 . . ? 
C6 C7 H7 107.8 . . ? 
C8 C7 H7 107.8 . . ? 
C7 C8 H8A 109.5 . . ? 
C7 C8 H8B 109.5 . . ? 
H8A C8 H8B 109.5 . . ? 
C7 C8 H8C 109.5 . . ? 
H8A C8 H8C 109.5 . . ? 
H8B C8 H8C 109.5 . . ? 
N1 C9 C10 114.7(2) . . ? 
N1 C9 C11 107.2(2) . . ? 
C10 C9 C11 108.9(2) . . ? 
N1 C9 C12 106.53(19) . . ? 
C10 C9 C12 110.3(2) . . ? 
C11 C9 C12 108.9(2) . . ? 
C9 C10 H10A 109.5 . . ? 
C9 C10 H10B 109.5 . . ? 
H10A C10 H10B 109.5 . . ? 
C9 C10 H10C 109.5 . . ? 
H10A C10 H10C 109.5 . . ? 
H10B C10 H10C 109.5 . . ? 
C9 C11 H11A 109.5 . . ? 
C9 C11 H11B 109.5 . . ? 
H11A C11 H11B 109.5 . . ? 
C9 C11 H11C 109.5 . . ? 
H11A C11 H11C 109.5 . . ? 
H11B C11 H11C 109.5 . . ? 
O1 C12 N2 127.6(2) . . ? 
O1 C12 C9 120.1(2) . . ? 
N2 C12 C9 112.2(2) . . ? 
N2 C13 C14 122.1(2) . . ? 
N2 C13 C18 119.7(2) . . ? 
C14 C13 C18 118.0(2) . . ? 
C15 C14 C13 121.2(2) . . ? 
C15 C14 H14 119.4 . . ? 
C13 C14 H14 119.4 . . ? 
C14 C15 C16 120.7(2) . . ? 
C14 C15 H15 119.6 . . ? 
C16 C15 H15 119.6 . . ? 
C17 C16 C15 118.8(2) . . ? 
C17 C16 H16 120.6 . . ? 
C15 C16 H16 120.6 . . ? 
C16 C17 C18 121.7(2) . . ? 
C16 C17 H17 119.2 . . ? 
C18 C17 H17 119.2 . . ? 
C17 C18 C13 119.4(2) . . ? 
C17 C18 C19 116.2(2) . . ? 
C13 C18 C19 124.4(2) . . ? 
N3 C19 C18 121.2(2) . . ? 
N3 C19 C20 122.8(2) . . ? 
C18 C19 C20 115.8(2) . . ? 
C25 C20 C21 119.0(2) . . ? 
C25 C20 C19 123.8(2) . . ? 
C21 C20 C19 117.2(2) . . ? 
C22 C21 C20 120.6(2) . . ? 
C22 C21 H21 119.7 . . ? 
C20 C21 H21 119.7 . . ? 
C21 C22 C23 120.2(3) . . ? 
C21 C22 H22 119.9 . . ? 
C23 C22 H22 119.9 . . ? 
C24 C23 C22 119.8(3) . . ? 
C24 C23 H23 120.1 . . ? 
C22 C23 H23 120.1 . . ? 
C23 C24 C25 120.5(3) . . ? 
C23 C24 H24 119.8 . . ? 
C25 C24 H24 119.8 . . ? 
C24 C25 C20 119.9(3) . . ? 
C24 C25 H25 120.1 . . ? 
C20 C25 H25 120.1 . . ? 
N3 C26 C30 106.2(2) . . ? 
N3 C26 C27 113.2(2) . . ? 
C30 C26 C27 112.2(2) . . ? 
N3 C26 H26 108.4 . . ? 
C30 C26 H26 108.4 . . ? 
C27 C26 H26 108.4 . . ? 
C28 C27 C29 111.3(2) . . ? 
C28 C27 C26 112.3(2) . . ? 
C29 C27 C26 110.5(2) . . ? 
C28 C27 H27 107.5 . . ? 
C29 C27 H27 107.5 . . ? 
C26 C27 H27 107.5 . . ? 
C27 C28 H28A 109.5 . . ? 
C27 C28 H28B 109.5 . . ? 
H28A C28 H28B 109.5 . . ? 
C27 C28 H28C 109.5 . . ? 
H28A C28 H28C 109.5 . . ? 
H28B C28 H28C 109.5 . . ? 
C27 C29 H29A 109.5 . . ? 
C27 C29 H29B 109.5 . . ? 
H29A C29 H29B 109.5 . . ? 
C27 C29 H29C 109.5 . . ? 
H29A C29 H29C 109.5 . . ? 
H29B C29 H29C 109.5 . . ? 
O3 C30 O2 124.0(2) . . ? 
O3 C30 C26 119.6(2) . . ? 
O2 C30 C26 116.4(2) . . ? 
Cl2S C1S Cl1S 111.60(18) . . ? 
Cl2S C1S H1S1 109.3 . . ? 
Cl1S C1S H1S1 109.3 . . ? 
Cl2S C1S H1S2 109.3 . . ? 
Cl1S C1S H1S2 109.3 . . ? 
H1S1 C1S H1S2 108.0 . . ? 
  
loop_ 
 _geom_torsion_atom_site_label_1 
 _geom_torsion_atom_site_label_2 
 _geom_torsion_atom_site_label_3 
 _geom_torsion_atom_site_label_4 
 _geom_torsion 
 _geom_torsion_site_symmetry_1 
 _geom_torsion_site_symmetry_2 
 _geom_torsion_site_symmetry_3 
 _geom_torsion_site_symmetry_4 
 _geom_torsion_publ_flag 
N3 Ni1 O2 C30 10.96(18) . . . . ? 
#N2 Ni1 O2 C30 -102.1(11) . . . . ? 
N1 Ni1 O2 C30 -168.69(18) . . . . ? 
#N3 Ni1 N1 C9 125(4) . . . . ? 
N2 Ni1 N1 C9 -34.90(15) . . . . ? 
O2 Ni1 N1 C9 140.90(16) . . . . ? 
#N3 Ni1 N1 C7 -105(4) . . . . ? 
N2 Ni1 N1 C7 94.80(18) . . . . ? 
O2 Ni1 N1 C7 -89.39(18) . . . . ? 
N3 Ni1 N2 C12 -159.05(17) . . . . ? 
#O2 Ni1 N2 C12 -46.4(12) . . . . ? 
N1 Ni1 N2 C12 20.51(17) . . . . ? 
N3 Ni1 N2 C13 33.5(2) . . . . ? 
#O2 Ni1 N2 C13 146.2(10) . . . . ? 
N1 Ni1 N2 C13 -146.9(2) . . . . ? 
N2 Ni1 N3 C19 -20.0(2) . . . . ? 
O2 Ni1 N3 C19 164.3(2) . . . . ? 
#N1 Ni1 N3 C19 -180(100) . . . . ? 
N2 Ni1 N3 C26 158.82(16) . . . . ? 
O2 Ni1 N3 C26 -16.96(16) . . . . ? 
#N1 Ni1 N3 C26 -1(4) . . . . ? 
C6 C1 C2 C3 -0.7(4) . . . . ? 
C1 C2 C3 C4 1.1(4) . . . . ? 
C2 C3 C4 C5 -0.3(4) . . . . ? 
C3 C4 C5 C6 -0.9(4) . . . . ? 
C2 C1 C6 C5 -0.5(4) . . . . ? 
C2 C1 C6 C7 -176.3(3) . . . . ? 
C4 C5 C6 C1 1.3(4) . . . . ? 
C4 C5 C6 C7 177.0(2) . . . . ? 
C9 N1 C7 C6 67.7(3) . . . . ? 
Ni1 N1 C7 C6 -56.1(3) . . . . ? 
C9 N1 C7 C8 -168.2(2) . . . . ? 
Ni1 N1 C7 C8 68.0(2) . . . . ? 
C1 C6 C7 N1 -117.5(3) . . . . ? 
C5 C6 C7 N1 67.0(3) . . . . ? 
C1 C6 C7 C8 120.2(3) . . . . ? 
C5 C6 C7 C8 -55.3(3) . . . . ? 
C7 N1 C9 C10 34.3(3) . . . . ? 
Ni1 N1 C9 C10 163.66(19) . . . . ? 
C7 N1 C9 C11 155.4(2) . . . . ? 
Ni1 N1 C9 C11 -75.2(2) . . . . ? 
C7 N1 C9 C12 -88.1(2) . . . . ? 
Ni1 N1 C9 C12 41.3(2) . . . . ? 
C13 N2 C12 O1 -16.7(4) . . . . ? 
Ni1 N2 C12 O1 175.9(2) . . . . ? 
C13 N2 C12 C9 167.6(2) . . . . ? 
Ni1 N2 C12 C9 0.2(3) . . . . ? 
N1 C9 C12 O1 155.7(2) . . . . ? 
C10 C9 C12 O1 30.6(3) . . . . ? 
C11 C9 C12 O1 -88.9(3) . . . . ? 
N1 C9 C12 N2 -28.2(3) . . . . ? 
C10 C9 C12 N2 -153.3(2) . . . . ? 
C11 C9 C12 N2 87.1(2) . . . . ? 
C12 N2 C13 C14 -15.4(4) . . . . ? 
Ni1 N2 C13 C14 151.0(2) . . . . ? 
C12 N2 C13 C18 169.9(2) . . . . ? 
Ni1 N2 C13 C18 -23.7(3) . . . . ? 
N2 C13 C14 C15 -169.3(2) . . . . ? 
C18 C13 C14 C15 5.4(4) . . . . ? 
C13 C14 C15 C16 -1.1(4) . . . . ? 
C14 C15 C16 C17 -3.4(4) . . . . ? 
C15 C16 C17 C18 3.4(4) . . . . ? 
C16 C17 C18 C13 1.0(4) . . . . ? 
C16 C17 C18 C19 179.6(2) . . . . ? 
N2 C13 C18 C17 169.5(2) . . . . ? 
C14 C13 C18 C17 -5.4(4) . . . . ? 
N2 C13 C18 C19 -9.0(4) . . . . ? 
C14 C13 C18 C19 176.2(2) . . . . ? 
C26 N3 C19 C18 177.3(2) . . . . ? 
Ni1 N3 C19 C18 -4.0(3) . . . . ? 
C26 N3 C19 C20 -6.9(4) . . . . ? 
Ni1 N3 C19 C20 171.81(18) . . . . ? 
C17 C18 C19 N3 -154.3(2) . . . . ? 
C13 C18 C19 N3 24.2(4) . . . . ? 
C17 C18 C19 C20 29.6(3) . . . . ? 
C13 C18 C19 C20 -151.9(2) . . . . ? 
N3 C19 C20 C25 63.0(4) . . . . ? 
C18 C19 C20 C25 -121.0(3) . . . . ? 
N3 C19 C20 C21 -115.2(3) . . . . ? 
C18 C19 C20 C21 60.8(3) . . . . ? 
C25 C20 C21 C22 -2.4(4) . . . . ? 
C19 C20 C21 C22 175.9(2) . . . . ? 
C20 C21 C22 C23 1.1(4) . . . . ? 
C21 C22 C23 C24 0.9(4) . . . . ? 
C22 C23 C24 C25 -1.7(4) . . . . ? 
C23 C24 C25 C20 0.5(4) . . . . ? 
C21 C20 C25 C24 1.6(4) . . . . ? 
C19 C20 C25 C24 -176.6(2) . . . . ? 
C19 N3 C26 C30 -162.5(2) . . . . ? 
Ni1 N3 C26 C30 18.6(2) . . . . ? 
C19 N3 C26 C27 74.0(3) . . . . ? 
Ni1 N3 C26 C27 -104.9(2) . . . . ? 
N3 C26 C27 C28 75.1(3) . . . . ? 
C30 C26 C27 C28 -45.0(3) . . . . ? 
N3 C26 C27 C29 -160.0(2) . . . . ? 
C30 C26 C27 C29 79.9(3) . . . . ? 
Ni1 O2 C30 O3 177.9(2) . . . . ? 
Ni1 O2 C30 C26 -2.0(3) . . . . ? 
N3 C26 C30 O3 169.2(2) . . . . ? 
C27 C26 C30 O3 -66.7(3) . . . . ? 
N3 C26 C30 O2 -10.8(3) . . . . ? 
C27 C26 C30 O2 113.3(2) . . . . ? 
  
loop_ 
 _geom_hbond_atom_site_label_D 
 _geom_hbond_atom_site_label_H 
 _geom_hbond_atom_site_label_A 
 _geom_hbond_distance_DH 
 _geom_hbond_distance_HA 
 _geom_hbond_distance_DA 
 _geom_hbond_angle_DHA 
 _geom_hbond_site_symmetry_A 
N1 H1N O3  0.81(3) 2.29(3) 3.022(3) 150(3) 4_456 
  
_diffrn_measured_fraction_theta_max    0.997 
_diffrn_reflns_theta_full              25.99 
_diffrn_measured_fraction_theta_full   0.997 
_refine_diff_density_max    0.775 
_refine_diff_density_min   -0.343 
_refine_diff_density_rms    0.070 
  
#===END 
